**Metabolic fates and effects of nitrite in brown trout under normoxic and hypoxic conditions:  
blood and tissue nitrite metabolism and interactions with branchial *NOS*, *Na<sup>+</sup>/K<sup>+</sup>-ATPase* and  
*hsp70* expression**

Frank B. Jensen\*, Lucie Gerber, Marie N. Hansen and Steffen S. Madsen

Department of Biology, University of Southern Denmark, Campusvej 55, DK-5230 Odense M,  
Denmark.

\*Author for correspondence (fbj@biology.sdu.dk)

## ABSTRACT

Nitrite secures essential nitric oxide (NO) bioavailability in hypoxia at low endogenous concentrations, whereas it becomes toxic at high concentrations. We exposed brown trout to normoxic and hypoxic water in the absence and presence of added ambient nitrite to decipher the cellular metabolism and effects of nitrite at basal and elevated concentrations under different oxygen regimes. We also tested hypotheses concerning influences of nitrite on branchial nitric oxide synthase (*NOS*),  $\text{Na}^+/\text{K}^+$ -ATPase (*nka*) and heat shock protein (*hsp70*) mRNA expression. Basal plasma and erythrocyte nitrite levels were higher in hypoxia than normoxia, suggesting increased NOS activity. Nitrite exposure strongly elevated nitrite concentrations in plasma, erythrocytes, heart tissue and white muscle, which was associated with an extensive metabolism of nitrite to nitrate and to iron-nitrosylated and S-nitrosated compounds. Nitrite uptake was slightly higher in hypoxia than normoxia, and high internal nitrite levels extensively converted blood hemoglobin to methemoglobin and nitrosylhemoglobin. Hypoxia increased inducible NOS (*iNOS*) mRNA levels in gills, which was overruled by a strong inhibition of *iNOS* expression by nitrite in both normoxia and hypoxia, suggesting negative feedback regulation of *iNOS* gene expression by nitrite. A similar inhibition was absent for neuronal *NOS*. Branchial NKA activity stayed unchanged, but mRNA levels of the *NKA*  $\alpha 1a$  subunit increased with hypoxia and nitrite, which may have countered an initial NKA inhibition. Nitrite also increased *hsp70* gene expression, probably contributing to cytoprotective effects of nitrite at low concentrations. Nitrite displays a concentration-dependent switch between positive and negative effects resembling other signaling molecules.

Key words: Hypoxia, Nitric oxide, Nitrite, NOS, HSP70

## INTRODUCTION

Nitrite is a two-edged sword in animal biology that exerts positive effect at low concentrations and harmful effects at high concentrations. Nitrite is generated endogenously as an oxidative metabolite of the signaling molecule nitric oxide (NO) produced by nitric oxide synthases (NOS), giving rise to nitrite concentrations at or below the micromolar range in blood and tissues of fish (Hansen and Jensen, 2010; Sandvik et al., 2012) and mammals (Bryan et al., 2005). The natural pool of nitrite functions as a reservoir of NO availability, from which NO can be regenerated under hypoxic conditions via a number of cellular proteins (including deoxygenated hemoglobin and myoglobin) that reduce nitrite to NO, allowing a continued NO production when NOS enzymes become compromised by O<sub>2</sub> lack (Lundberg et al., 2008; Jensen, 2009). This route of NO generation contributes to hypoxic vasodilation, regulation of mitochondrial respiration and cytoprotection (Lundberg et al., 2008) and is extensively exploited in hypoxia-tolerant fish during severe hypoxia (Hansen and Jensen, 2010; Sandvik et al., 2012).

Freshwater fish also take up nitrite actively across the gills, causing an excessive uptake in nitrite-contaminated water, which leads to toxic internal concentrations (Jensen, 2003). The toxicity and physiological disturbances induced by nitrite have been widely studied in fish, because of the potential risk of nitrite built-up in both natural aquatic ecosystems and aquaculture systems (Lewis and Morris, 1986; Jensen, 2003). Nitrite is taken up in competition with chloride for the active Cl<sup>-</sup> uptake mechanism in the gills of freshwater fish, and uptake rates vary with species-specific requirements for Cl<sup>-</sup> uptake (Williams and Eddy, 1986; Tomasso and Grosell, 2005) and ambient conditions such as [Cl<sup>-</sup>], temperature and CO<sub>2</sub> tensions (Jensen, 2003). As nitrite gradually accumulates in blood during nitrite exposure, a severe methemoglobinemia develops, because nitrite-induced oxidation of functional hemoglobin (Hb) to methemoglobin (metHb) increasingly exceeds the capacity of erythrocyte metHb reductase to reduce metHb back to functional Hb. Certainly, methemoglobinemia is a central physiological problem during nitrite exposure, but additional cardiorespiratory, ion regulatory and endocrine disturbances are also induced (Jensen, 2003).

Recent studies have addressed the possibility that nitrite, when accumulated to high concentrations, causes an excess NO generation that contributes to nitrite toxicity. Indeed, the enhanced nitrite reduction to NO during nitrite exposure is associated with elevated levels of nitrosyl hemoglobin (HbNO, with NO tightly bound to heme), which – together with the elevated metHb levels – contributes significantly to the lowering of blood O<sub>2</sub> carrying capacity (Jensen, 2007; Jensen and Hansen, 2011, Lefevre et al., 2011). Nitrite accumulation also induces iron-nitrosylation (FeNO) of other heme proteins as well as extensive nitrosation of cellular thiols (forming SNO) and amines (forming NNO), suggestive of nitrosative stress and malfunctioning of

critical proteins (Jensen and Hansen, 2011). Such effects of nitrite exposure are likely to differ in normoxic and hypoxic environments, because hypoxia promotes NO formation from nitrite, and because hypoxia increases the respiratory surface area of the gills, which may increase the branchial ion permeability and hence the need for active ion uptake. This idea has so far only been investigated in goldfish, where nitrite uptake surprisingly was found to be reduced rather than increased during hypoxia (Jensen and Hansen, 2011). This may be a special feature related to the extensive gill rearrangements that occur in goldfish (and crucian carp) during hypoxia (Nilsson, 2007), which is associated with a reduced rather than increased active  $\text{Cl}^-$  uptake rate (Mitrovic et al., 2009). Thus, it is pertinent to investigate fish without such gill remodeling, like trout that relies on traditional lamellar recruitment (Booth, 1979; Soivio and Tuurala, 1981) for increasing gill surface area in hypoxia.

Nitrite intermingles with several physiological processes, and the study of these at both low and high nitrite concentrations can help identify these mechanisms and their potential roles and consequences under both natural and toxic scenarios. In the present study we examined effects and metabolism of nitrite at low (basal) and high (exposed) concentrations under both normoxic and hypoxic conditions, using a species – brown trout (*Salmo trutta* L.) – that is comparatively intolerant of hypoxia. The aim was to gain new comparative knowledge on basal NO metabolite levels and on the uptake and metabolism of nitrite in blood and tissues under different oxygen regimes. We also tested specific new hypotheses that relates to the NO generating power of nitrite. Thus, NO has been shown to inhibit branchial  $\text{Na}^+/\text{K}^+$ -ATPase (NKA) activity in brown trout (Tipsmark and Madsen, 2003), and we predicted that nitrite would exert a similar inhibition, and that this would become reflected in a reduced branchial NKA activity and increased *nka* mRNA expression. We also hypothesized the existence of crosstalk between nitrite and the NOS reaction, so that nitrite – as a natural product of the NOS reaction – exerts a negative feedback inhibition on *NOS* gene expression. As fish lack an endothelial *NOS* gene, this idea was tested through measurements of the branchial mRNA expression of the two NOS isoforms that are present in fish (Andreakis et al., 2011): neuronal NOS (nNOS or NOS1) and inducible NOS (iNOS or NOS2). Finally, since it has been shown that nitrite up-regulates gene expression of cytoprotective heat shock protein 70 (HSP70) in mammalian tissues (Bryan et al., 2005), we hypothesized that nitrite exposure would induce an increased *hsp70* mRNA expression in fish.

## RESULTS

Exposure to normoxia ( $\text{Po}_2 > 140$  mmHg), hypoxia ( $\text{Po}_2 = 70$  mmHg) or nitrite ( $1 \text{ mmol l}^{-1}$ ) in normoxic water for 24 h did not cause mortality, whereas 3 out of 8 fish died during 24 h combined exposure to nitrite and hypoxia.

Total blood Hb did not differ significantly between the four experimental groups (Fig. 1A). MetHb was below 0.5 % of total Hb in normoxic and hypoxic control fish, whereas it increased to 64% of total Hb after 24 h exposure to 1 mmol l<sup>-1</sup> ambient nitrite under both normoxic and hypoxic conditions (Fig. 1B). Blood [HbNO] also increased during nitrite exposure reaching mean values of 7 and 9 % of total Hb in normoxic and hypoxic fish (Fig. 1C).

Basal plasma [nitrite] was 0.33 µmol l<sup>-1</sup> in normoxic fish and increased slightly but significantly to 0.66 µmol l<sup>-1</sup> after 24 h hypoxia (Fig. 2A). Exposure to nitrite for 24 h was associated with pronounced increases in plasma [nitrite] to values around 2.6 mmol l<sup>-1</sup> (Fig. 2A). Thus, nitrite was accumulated to values above the ambient level (1 mmol l<sup>-1</sup>), but the degree of accumulation was similar in normoxic and hypoxic fish. Plasma [nitrate] was some 65 µmol l<sup>-1</sup> in control fish and increased significantly to the millimolar range upon nitrite exposure, reaching higher values in hypoxic than normoxic fish (Fig. 2B).

Plasma [lactate] increased with nitrite exposure and with hypoxia exposure, reaching the highest values during combined hypoxia and nitrite exposure; but the statistics were not entirely conclusive (Fig. 2C).

The basal concentration of nitrite in RBCs was higher in hypoxic than in normoxic fish (around 1 and 2 µmol l<sup>-1</sup>, respectively) (Fig. 3A). Nitrite exposure was associated with profound increases in RBC [nitrite] to the millimolar range with no significant difference in values between normoxic and hypoxic fish (Fig. 3A). The major rise in erythrocyte [nitrite] induced phenomenal increases in erythrocyte SNO and HbNO from submicromolar towards millimolar values (Fig. 3B,C). Notably, erythrocyte SNO levels were significantly higher under hypoxic than normoxic conditions (Fig. 3B). The thiol compounds that were S-nitrosated will include both proteins (mainly Hb in RBCs) and glutathione.

In the heart ventricle, nitrite was elevated from a basal level around 1 µmol l<sup>-1</sup> to thousand fold higher values in nitrite exposed fish under both normoxia and hypoxia (Fig. 3D). This produced significant elevations of both SNO (Fig. 3 E) and FeNO+NNO (Fig. 3F) in cardiac tissue.

White muscle tissue also experienced significant elevations of cellular [nitrite] (Fig. 3G) and cellular [SNO] (Fig. 3H) during nitrite exposure, but the absolute values reached were significantly lower than corresponding values in cardiac muscle.

The mRNA expression of *eflα* in gill tissue did not change with either hypoxia or nitrite exposure, rendering *eflα* an appropriate gene to which other gene expressions could be normalized. Gill *iNOS* mRNA levels were significantly elevated in hypoxic fish compared to normoxic controls, revealing an increased *iNOS* gene expression with 24 h of hypoxia (Fig. 4A), provided that the gene product (protein) expression follows the increase in transcription. Nitrite exposure, on the other hand, was associated with strongly decreased *iNOS* mRNA levels under both normoxic and hypoxic

conditions, suggesting a profound inhibition of *iNOS* gene expression by nitrite (Fig. 4A, note logarithmic scale). Changes in gill *nNOS* mRNA expression were more modest, with a tendency for slightly higher expression with hypoxia and nitrite than in normoxic controls (Fig. 4B).

Gill NKA activity did not vary significantly between the four groups (Fig. 5A), showing that the maximal enzymatic capacity was not influenced by 24 h of hypoxia or nitrite exposure. The mRNA expression of the *nka  $\alpha$ 1a* subunit was, however, significantly elevated by hypoxia, and nitrite exposure induced a further significant increase (Fig. 5B). *nka  $\alpha$ 1b* mRNA expression only rose significantly during normoxic nitrite exposure (Fig. 5C).

The mRNA expression of gill *hsp70* was the same in normoxic and hypoxic fish, whereas nitrite exposure caused a significant elevation of *hsp70* mRNA levels under both normoxic and hypoxic conditions (Fig. 6).

## DISCUSSION

### Nitrite uptake and metabolism

Nitrite is naturally present in organisms at or below micromolar concentrations, because it is formed as an oxidative metabolite of NO produced by NOS enzymes. Plasma [nitrite] was 0.33  $\mu\text{mol l}^{-1}$  in normoxic control fish (Fig. 2A), which compares with values in marine fish and mammals (Jensen, 2009) and is slightly lower than seen in freshwater goldfish and crucian carp (Hansen and Jensen, 2010; Sandvik et al., 2012). The plasma concentration increased to 0.66  $\mu\text{mol l}^{-1}$  in hypoxic brown trout, which contrasts with declines in plasma [nitrite] during hypoxia in flounder, goldfish and crucian carp (Jensen, 2009; Hansen and Jensen, 2010; Sandvik et al., 2012). While a decline in plasma [nitrite] under strong hypoxia can be explained by decreased NOS enzyme activity (because  $\text{O}_2$  is a co-substrate of the reaction, and  $\text{O}_2$  becomes limiting under strong hypoxia) and shift of nitrite from plasma to tissues (Hansen and Jensen, 2010; Sandvik et al., 2012), the more moderate hypoxia (in terms of absolute  $\text{Po}_2$ ) in the present experiments may have allowed an increased protein expression of NOS with subsequent increased NO and nitrite productions, as reported in rainbow trout (McNeill and Perry, 2006). Indeed, we observed an increased *NOS* mRNA expression in the gills of hypoxic brown trout (Fig. 4), which may also have occurred in other tissues, and an increased *NOS* mRNA expression is typically translated into increased protein levels (LeCras et al., 1996; McNeill and Perry, 2006; Thompson et al., 2009).

Freshwater fish take up nitrite across the gills, particularly when ambient nitrite rises to levels comparable to ambient  $[\text{Cl}^-]$ , because nitrite and chloride competes for the same active branchial  $\text{Cl}^-$  uptake mechanism (Williams and Eddy, 1986; Jensen, 2003). During nitrite exposure, the plasma nitrite concentration rose well above the ambient level (Fig. 2). Plasma [nitrite] was, however, the same under normoxia and hypoxia (Fig. 2A). Plasma [nitrite] during nitrite exposure is a complex

function of branchial uptake rates, transport between extracellular and intracellular compartments, tissue nitrite metabolism to other metabolites, and kidney excretion. Cellular [nitrite] was substantially elevated in RBCs, heart and skeletal muscle (Fig. 3A, D, C), showing that nitrite taken up across the gills was transported into tissues. The levels attained in RBCs and heart ventricle did not differ significantly between normoxia and hypoxia (Fig. 3A,D), while nitrite increased to higher values under hypoxic than normoxic conditions in white skeletal muscle (Fig. 3G). The latter suggests an increased total body nitrite burden under hypoxic conditions, because white skeletal muscle constitutes some 50% of total fish mass. A substantial amount of nitrite taken up across the gills is internally metabolized and detoxified to nitrate (e.g. in RBCs and liver), raising plasma nitrate levels during nitrite exposure (Doblender and Lackner, 1996; Stormer et al., 1996). This nitrate production should be taken into account when judging the magnitude of branchial nitrite uptake. The higher plasma nitrate levels during hypoxic than normoxic nitrite exposure (Fig. 2B) accordingly support a somewhat higher nitrite uptake during hypoxia than normoxia. The same applies to the alternative metabolism of nitrite to SNO and FeNO compounds, as cellular SNO and FeNO metabolites were generally higher during hypoxia than normoxia (Fig. 3B-F). Taken together, the data therefore suggests a slightly higher nitrite uptake in hypoxic than normoxic brown trout in support of the idea that hypoxia-induced lamellar recruitment increases the need for active ion uptake (cf. introduction). The difference is, however, small and not comparable to the large difference in nitrite uptake between normoxic and hypoxic goldfish (Jensen and Hansen, 2011).

The extensive formation of cellular FeNO (via NO formation from nitrite), NNO and SNO (e.g. via formation of nitrosating  $N_2O_3$ ) in nitrite-exposed brown trout (Fig. 3) is similar to observations in nitrite-exposed goldfish, supporting the view that high nitrite concentration induces nitrosative stress with excessive nitros(yl)ation of critical proteins (Jensen and Hansen, 2011). The formation of FeNO+NNO and SNO compounds was largest in RBCs followed by heart and white muscle tissue, and it was typically augmented by hypoxia (Fig. 3).

### **Branchial expression of *iNOS* and *nNOS***

Hypoxia significantly increased gill *iNOS* mRNA levels and tended to increase *nNOS* mRNA levels (Fig. 4). This bears resemblance to increased *nNOS* mRNA and protein expressions in brain and posterior cardinal vein of hypoxic rainbow trout (McNeill and Perry, 2006), increased mRNA and protein expressions of *iNOS* and *eNOS* in hypoxic rat lungs (LeCras et al., 1996) and an increased *iNOS* and unchanged *nNOS* expression in hypoxic fetal guinea pig hearts (Thompson et al., 2009). An up-regulation of *iNOS* expression in hypoxia may be mediated by hypoxia inducible factor-1 but other possibilities also exist (Thompson et al., 2009; Robinson et al., 2011). The activity (NO production) of *iNOS* enzymes is mainly regulated at the transcriptional level (Aktan, 2004). Thus,



as mentioned above, the increased NOS expression can increase NO production under moderate hypoxia, where the O<sub>2</sub> substrate is not reduced below levels that are critical for the NOS reaction to occur. A more severe degree of hypoxia was found to decrease *iNOS* mRNA expression in crucian carp gills, and the decrease was augmented by anoxia (Sandvik et al., 2012). It thus appears that the influence of hypoxia on *NOS* gene expression may depend on the degree of hypoxia and species.

An exciting discovery in the present study was the profound decrease in *iNOS* mRNA levels induced by nitrite (Fig. 4A). This finding supports negative feedback regulation of *iNOS* gene expression by a product of the NOS reaction (the NO metabolite nitrite), provided that translational efficiency remains unaltered. NO has been reported to inhibit *iNOS* gene expression in mammalian glial cells and hepatocytes by inhibiting the nuclear transcription factor NF- $\kappa$ B (Colasanti et al., 1995; Taylor et al., 1997; Park et al., 1997). It has furthermore been shown that S-nitrosation of conserved NF- $\kappa$ B cysteines inhibits gene transcription by decreasing NF- $\kappa$ B binding to the *iNOS* promoter (Marshall and Stamler, 2001; Kelleher et al., 2007). Since SNO formation is generally increased during nitrite exposure (Fig. 3), it is conceivable that the profound nitrite-induced inhibition of *iNOS* mRNA expression could be triggered by S-nitrosation of NF- $\kappa$ B. The inhibition of *iNOS* gene transcription by nitrite was very potent and strongly overruled the induction of *iNOS* that was caused by hypoxia (Fig. 4A). A similar nitrite-induced inhibition was absent for branchial *nNOS* (Fig. 4B).

### **Branchial Na<sup>+</sup>/K<sup>+</sup>-ATPase activity**

On basis of a reported inhibitory effect of NO on gill NKA activity (Tipsmark and Madsen, 2003; Ebbesson et al., 2005), and the formation of NO from nitrite, particularly under hypoxic conditions, we anticipated that nitrite exposure would inhibit branchial NKA activity. Hypoxia *per se* can also decrease gill NKA activity in fish (Richards et al., 2007; Wood et al., 2007; Lundgreen et al., 2008; Hansen and Jensen, 2010). It was therefore unexpected that neither nitrite nor hypoxia changed NKA activity in the present experiments (Fig. 4). It is possible that water Po<sub>2</sub> in both normoxia (Po<sub>2</sub> > 140 mmHg) and hypoxia (Po<sub>2</sub> = 70 mmHg) were sufficiently high to avoid cellular hypoxia in the branchial cells, given their intimate contact with the water. This would limit both conversion of nitrite to NO (promoted by very low Po<sub>2</sub>) and any direct hypoxia effect. The relative short exposure time (24 h) could also be important. Earlier reports of a decreased branchial NKA activity during hypoxia used either stronger hypoxia and/or longer exposures (Richards et al., 2007; Wood et al., 2007; Lundgreen et al., 2008; Hansen and Jensen, 2010). Indeed, short term (4 h) hypoxia at a water Po<sub>2</sub> of 80 mmHg did not change gill NKA activity in rainbow trout (Iftikar et al., 2010) like here in brown trout. Effects of nitrite exposure on NKA activity have previously been examined in two marine fish. In sea bass *Lates calcarifer*, branchial NKA activity was reduced after 4 days exposure



to 3.6 mM ambient nitrite in normoxic seawater (Woo and Chiu, 1997), while NKA activity increased after 7 days exposure to the same concentration in silver sea bream *Sparus sarba* (Deane and Woo, 2007). The effects of nitrite accordingly appear to vary, which in part could be due to a compensatory up-regulation of pump abundance following an inhibition of its activity.

We observed significantly higher mRNA levels of *nka  $\alpha$ 1a* in brown trout gills with hypoxia and a further larger increase with nitrite exposure (Fig. 5B). The increased mRNA expression of *nka  $\alpha$ 1a*, which is the dominant NKA  $\alpha$ 1 isoform in freshwater (Richards et al., 2003), can be viewed as a compensatory transcriptional response that counteracts an inhibition of NKA. Thus, if the increased mRNA levels translated into increased protein abundance, an inhibition of NKA by hypoxia and nitrite would be alleviated, and total NKA activity could be unchanged as actually observed.

### **Branchial *hsp70* expression**

Hypoxia can potentially induce HSP70 expression in fish (Roberts et al., 2010), but branchial *hsp70* mRNA levels were not elevated above basal levels at the present moderate degree of hypoxia. Nitrite exposure, on the other hand, significantly elevated *hsp70* mRNA levels in gills under both normoxic and hypoxic conditions (Fig. 6). This finding corroborates recent reports of increased *hsp70* mRNA (Sun et al., 2014) and protein (Deane and Woo, 2007) expressions in tissues of nitrite-exposed fish. Based on mammalian data it seems likely that nitrite can increase HSP70 protein expression at only moderately elevated nitrite concentrations (Bryan et al., 2005). This would contribute to the cytoprotective effect of moderately elevated nitrite concentrations that reduce tissue injury during ischemia-reperfusion events in mammals (Shiva et al., 2007; Chouchani et al., 2013). The cytoprotection acts in part through Fe-nitrosylation and S-nitrosation of complexes in the mitochondrial respiratory chain, which limits generation of reactive oxygen species (ROS) and oxidative protein damage (Shiva et al., 2007; Chouchani et al., 2013). The protection seems exploited by crucian carp and freshwater turtles that naturally endure cycles of anoxia and reoxygenation (Sandvik et al., 2012; Jensen et al., 2014). Induction of HSP70 assists cytoprotection by assuring correct protein folding and repair of damaged protein. This would also limit damage in a toxicological setting, but high nitrite concentrations may lead to excessive nitrosative stress, as is the case with high NO concentrations (Thomas et al., 2008), which will overrule cytoprotective effects. This is supported by reports of ultrastructural tissue damage in fish accumulating nitrite to high (millimolar) concentrations (Arillo et al., 1984; Sun et al., 2014).

## Heme-based reactions of nitrite in RBCs

Nitrite reacts with oxygenated Hb inside RBCs to form metHb and nitrate, and it reacts with deoxygenated Hb to form metHb and NO, with most of the generated NO subsequently binding to ferrous deoxygenated heme to produce HbNO or reacting with oxygenated Hb to produce metHb and nitrate (Jensen, 2009). Nitrite accumulation therefore leads to an extensive metHb formation (Fig. 1) that overrides the capacity of erythrocyte metHb reductase to reduce metHb to functional Hb. Due to the presence of deoxygenated Hb in venous blood, significant amounts of HbNO are also formed (Fig. 1), as first shown in nitrite-exposed zebrafish (Jensen, 2007) and subsequently in nitrite-exposed goldfish and striped catfish (Jensen and Hansen, 2011; Lefevre et al., 2011). MetHb and HbNO are both non-functional with respect to O<sub>2</sub> transport, and their sum therefore means that the nitrite-exposed brown trout had a blood O<sub>2</sub> carrying capacity that was less than 30% of normal (Fig. 1). This will decrease swimming performance and aerobic scope (Lefevre et al., 2011) and lower the tolerance towards hypoxia. Indeed, brown trout exposed to both hypoxia and nitrite were the most stressed fish, as reflected by lactate values (Fig. 1C) and the presence of mortality, which was absent in the other experimental groups.

## Concluding remarks

Our results emphasize nitrite as an important dichotomous player in animal physiology. Nitrite is an integral part of NO homeostasis by being an oxidative metabolite of NOS-derived NO, a donor of NO under hypoxia and – as here shown – a negative feedback inhibitor of *NOS* gene expression. At moderately elevated levels, the ability of nitrite to iron-nitrosylate and S-nitrosate proteins is involved in cytoprotection, which becomes aided by nitrite-induced induction of HSP70. However, at the high levels that develop in nitrite-exposed fish, nitro(sy)lation becomes excessive and switches into nitrosative stress, and blood Hb is extensively converted into non-functional metHb and HbNO. Such a concentration-dependent switch between positive and negative effects is in principle not different from that applicable for other signaling molecules such as NO, H<sub>2</sub>S or CO.

## MATERIALS AND METHODS

### Animals and experimental protocol

Brown trout (*Salmo trutta* L.) of male gender and body mass 61.4±2.2 g (mean ± s.e.m., N=31) were obtained from Funen Salmon Fish (Elsesminde, Odense, Denmark) and distributed among 4 identical aquaria with 80 l fresh water (Odense tap water with [Cl<sup>-</sup>] = 1.3 mmol l<sup>-1</sup> and [HCO<sub>3</sub><sup>-</sup>] = 4.8 mmol l<sup>-1</sup>) and 7-8 fish in each aquarium. The fish were acclimated to 15 °C and normoxic water (Po<sub>2</sub> > 140 mmHg via air bubbling) under a 12:12 h light:dark cycle for one week. Forty l of water was exchanged twice daily to avoid accumulation of waste products. Following acclimation, the

fish were assigned to four different experimental conditions: (1) 24 h continued normoxia (normoxic control,  $N=7$ ), (2) 24 h of hypoxia (hypoxic control,  $N=8$ ), (3) 24 h of nitrite exposure at 1 mmol l<sup>-1</sup> nitrite in normoxic water (normoxia + nitrite;  $N=8$ ) and (4) 24 h of nitrite exposure at 1 mmol l<sup>-1</sup> nitrite in hypoxic water (hypoxia + nitrite;  $N=8$ ). Normoxia ( $P_{O_2} > 140$  mmHg) was obtained by bubbling with air, and hypoxia was obtained by bubbling with N<sub>2</sub>. The level of hypoxia was  $P_{O_2} \sim 70$  mmHg. Water  $P_{O_2}$  was measured and controlled by a Loligo OXY-REG oxygen analyzer and regulator system (Loligo Systems Aps, Tjele, Denmark), using a set point of 44% air saturation (equivalent to  $P_{O_2}$  70 mmHg). Nitrite was added as NaNO<sub>2</sub>, and the level of 1 mmol l<sup>-1</sup> was confirmed by measurements via reductive chemiluminescence (cf. below).

### Sampling of blood and tissues

Fish were individually netted and anesthetised in water with 100 mg l<sup>-1</sup> MS-222 (ethyl 3-amineobenzoate methanesulfonate; Sigma Aldrich, Steinheim, Germany). A blood sample was taken from the caudal vessels with a heparinized syringe, where after the fish was euthanized by cutting the spinal cord. Procedures were in accordance with Danish laws of animal experimentation. The blood was immediately processed, while, at the same time, gills (second and third gill arch on the left side), heart ventricle and white skeletal muscle were quickly dissected out. One gill arch (the second) was placed in SEI-buffer solution (300 mmol l<sup>-1</sup> sucrose; 20 mmol l<sup>-1</sup> Na<sub>2</sub>EDTA; 50 mmol l<sup>-1</sup> imidazole; pH 7.3) for later measurement of gill Na<sup>+</sup>/K<sup>+</sup>-ATPase activity, and the other gill arch (the third) was immediately frozen in liquid N<sub>2</sub> for later analysis of mRNA expression of selected genes. The ventricle and white muscle tissues were quickly washed in a phosphate-buffered saline [50 mmol l<sup>-1</sup> phosphate buffer pH 7.8; 85 mmol l<sup>-1</sup> NaCl; 2.4 mmol l<sup>-1</sup> KCl; 10 mmol l<sup>-1</sup> N-ethylmaleimide (NEM); 0.1 mmol l<sup>-1</sup> diethylethylaminepentaacetic acid (DTPA)], and then dried on a filter paper, weighed and frozen in liquid N<sub>2</sub>.

Blood was transferred to a pre-weighed Eppendorf tube, and subsamples were taken for measurements of hematocrit (Hct) and hemoglobin (Hb) derivatives. The remaining blood was centrifuged (2 min, 16000 *g*, 5°C), and the plasma was transferred to a new Eppendorf tube. A subsample of plasma was taken for lactate measurement, and the remaining plasma was frozen in liquid N<sub>2</sub>. The tube containing the red blood cells (RBCs) was weighed (to determine RBC mass) and instantly frozen in liquid N<sub>2</sub>.

### Measurements

For measurements of nitrite, nitrate, S-nitroso and iron-nitrosyl compounds, the samples of ventricle and white skeletal muscle tissues were thawed in four times their mass of a 50 mmol l<sup>-1</sup> phosphate buffer (pH 7.3), containing 10 mmol l<sup>-1</sup> NEM and 0.1 mmol l<sup>-1</sup> DTPA to stabilize S-nitrosothiols

(Yang et al., 2003). The samples were homogenized and centrifuged (6 min, 16000 *g*, 2°C), after which the supernatants were frozen in liquid nitrogen and stored at -80 °C until measured. The RBCs samples were thawed by adding nine times their mass of a nitrite/SNO preservation solution, consisting of 5 mmol l<sup>-1</sup> K<sub>3</sub>[Fe(CN)<sub>6</sub>], 10 mmol l<sup>-1</sup> NEM, 0,1 mmol l<sup>-1</sup> DTPA and 1% NP-40 (Yang et al., 2003; Hansen and Jensen, 2010). The hemolysate was vortexed and centrifuged, and supernatants were immediately measured. Nitrite and its metabolites were assessed by reductive chemiluminescence, using a Sievers (Boulder, CO, USA) Nitric Oxide Analyzer (model 280i) and previously described procedures to distinguish between [nitrate], [nitrite], [SNO] and [FeNO + NNO] (Yang et al., 2003; Hansen and Jensen, 2010; Jensen and Hansen, 2011).

Gill Na<sup>+</sup>/K<sup>+</sup>-ATPase (NKA) activity was determined by a semi-micro method (McCormick, 1993) using a microplate reader (SPECTRAMax PLUS, Molecular Devices, Sunnyvale, CA, USA). The enzyme activity was normalized to the protein content of the sample and expressed as μmol ADP mg<sup>-1</sup> protein h<sup>-1</sup>. Protein concentration was measured by the Lowry method (Lowry et al., 1951).

For analysis of Hb derivatives, an accurate amount of freshly drawn blood was hemolysed in 1 ml 20 mmol l<sup>-1</sup> phosphate buffer with pH 7.3. Following centrifugation, a spectral scan was made on the hemolysate from 480 to 700 nm (Cecil CE2041, Cambridge, UK). The concentrations of oxyhemoglobin, methemoglobin, nitrosylhemoglobin and deoxyhemoglobin were evaluated by spectral deconvolution, using a least squares curve-fitting procedure and reference spectra of the four Hb derivatives, as previously described (Jensen, 2007). Hematocrit was measured by centrifugation of blood (2 min at 13700 *g*) in glass capillaries. Plasma lactate was determined by the lactate dehydrogenase enzymatic method after deproteinization of plasma with 0.6 N perchloric acid.

### **mRNA expression of genes encoding iNOS, nNOS, NKA α1a, NKA α1b and HSP70 in gill tissue**

Total RNA was isolated and extracted with TRIsure™ reagent (Bioline, London, UK) following the manufacturer's instructions. RNA concentration and purity was determined by measuring A260/A280. Total RNA (1 μg) was DNase treated with RQ1 RNase-free DNase (Promega, Madison, WI, USA) and used in first-strand cDNA synthesis with a High Capacity cDNA reverse transcriptase kit (Applied Biosystems, Foster, CA, USA) using random hexamers as a primer. Semi-quantitative real-time PCR analysis using SYBR Green detection was carried out on an Mx3000P instrument (Stratagene, La Jolla, CA, USA) using standard software settings. Reactions were carried out with 1 μl cDNA (50 ng total RNA), 6 μl (forward/reverse primers mix, final concentration 150 nM), 10 μl LightCycler® 480 SYBR green I Master (Roche, Indianapolis, IN,

USA) filled up to a total volume of 20µl with distilled water. Cycling condition: 94°C for 15s, 60°C for 60s (*eflα*, *nka α1a*, *nka α1b*, *hsp70*) or 64°C for 60s (*iNOS*, *nNOS*) in 40 cycles. Melting curve analysis was carried out routinely with 30s for each 1 °C temperature interval from 55° to 95°C.

For each primer set, a cDNA four-fold dilution series of six points have been generated in duplicate and analysed by qPCR to determine amplification efficiency. The amplification efficiency for each primer set was used for calculation of relative copy numbers of the respective target gene. Normalized copy numbers of the respective target genes were calculated according to Pfaffl (2001):  $(1+E_{tar})^{-Ct_{tar}}/(1+E_{eflα})^{-Ct_{eflα}}$ , where  $E$  is the amplification efficiency for the primer pairs,  $Ct$  is the cycle threshold value of the PCR products,  $tar$  is the target gene and *eflα* was used as normalization gene.

*iNOS* and *nNOS* primers were originally developed for rainbow trout (*Onchorynchus mykiss*) but proved to work well on the closely related brown trout. They were designed using Netprimer software (Premier Biosoft International, CA, USA) with standard settings and double checked using Primer3 software (version 0.4.0, Rozen and Skaletsky, 2000) based on *nNOS*, *iNOS* mRNA sequences from rainbow trout found in the National Center for Biotechnology Information (NCBI; Bethesda, MD, USA) GenBank. *hsp70* primers were designed from Atlantic salmon (*Salmo salar*) sequence as described by Takle *et al.* (2006). *nka α1a* and *eflα* primers were designed from respectively rainbow trout and Atlantic salmon sequences as described by Kiilerich *et al.* (2007). *nka α1b* primers are identical to the *nka α*-subunit specific primers based on rainbow trout mRNA sequences described by Richards *et al.* (2003). The high degree of conservation of nucleotide sequence between salmon and trout permits the use of primers between these two species. All primers were tested for nonspecific product amplification and primer–dimer formation using both melting curve analysis and 2.5% agarose gel verification. Primers sequences are listed in Table 1.

## Statistics

All results are presented as means ± s.e.m. Statistical differences between exposure groups were evaluated by one-way ANOVA followed by the Tukey post hoc means comparison test (Origin 8.5, OriginLab Corporation, Northampton, MA, USA). Differences between means were considered significant at  $P < 0.05$ .

## Acknowledgements

We thank Trine Johansson for technical assistance.

## Competing interests

The authors declare no competing financial interests.

## Author contributions

F.B.J. conceived the study; F.B.J., L.G., M.N.H. and S.S.M. designed and performed the experiments; F.B.J., L.G., M.N.H. and S.S.M. analyzed the data; F.B.J. wrote the paper; L.G., M.N.H. and S.S.M. edited the manuscript.

## Funding

The work was supported by the Danish Natural Science Research Council.

## References

- Aktan, F.** (2004). iNOS-mediated nitric oxide production and its regulation. *Life Sci.* **75**, 639-653.
- Andreakis N., D'Aniello, S., Albalat, R., Patti, F. P., Garcia-Fernandez, J., Procaccini, G., Sordino, P. and Palumbo, A.** (2011). Evolution of the nitric oxide synthase family in metazoans. *Mol. Biol. Evol.* **28**, 163-179.
- Arillo, A., Gaino, E., Margiocco, C., Mensi, P. and Schenone, G.** (1984). Biochemical and ultrastructural effects of nitrite in rainbow trout: liver hypoxia as the root of the acute toxicity mechanism. *Environ. Res.* **34**, 135-154.
- Booth, J. H.** (1979). The effects of oxygen supply, epinephrine, and acetylcholine on the distribution of blood flow in trout gills. *J. Exp. Biol.* **83**, 31-39.
- Bryan, N. S., Fernandez, B. O., Bauer, S. M., Gauria-Saura, M. F., Milsom, A. B., Rassaf, T., Maloney, R. E., Bharti, A., Rodriguez, J. and Feelisch, M.** (2005). Nitrite is a signaling molecule and regulator of gene expression in mammalian tissues. *Nat. Chem. Biol.* **1**, 290-297.
- Chouchani, E. T., Methner, C., Nadtochiy, S. M., Logan, A., Pell, V. R., Ding, S., James, A. M., Cochemé, H. M., Reinhold, J., Lilley, K. S. et al.** (2013). Cardioprotection by S-nitrosation of a cysteine switch in mitochondrial complex I. *Nat. Med.* **19**, 753-759.
- Colasanti, M., Persichini, T., Menegazzi, M., Mariotto, S., Giordano, E., Caldarera, C. M., Sogos, V., Lauro, G. M. and Suzuki, H.** (1995). Induction of nitric oxide synthase mRNA expression suppression by exogenous nitric oxide. *J. Biol. Chem.* **270**, 26731-26733.
- Deane, E. E. and Woo, N. Y. S.** (2007). Impact of nitrite exposure on endocrine, osmoregulatory and cytoprotective functions in the marine teleost *Sparus sarba*. *Aquat. Toxicol.* **82**, 85-93.
- Doblender, C. and Lackner, R.** (1996). Metabolism and detoxification of nitrite by trout hepatocytes. *Biochim. Biophys. Acta* **1289**, 270-274.
- Ebbesson, L. O. E., Tipsmark, C. K., Holmqvist, B., Nilsen, T., Andersson, E., Stefansson, S. O. and Madsen, S. S.** (2005). Nitric oxide synthase in the gill of Atlantic salmon: colocalization with and inhibition of Na<sup>+</sup>,K<sup>+</sup>-ATPase. *J. Exp. Biol.* **208**, 1011-1017.



- Hansen, M. N. and Jensen, F. B.** (2010). Nitric oxide metabolites in goldfish under normoxic and hypoxic conditions. *J. Exp. Biol.* **213**, 3593-3602.
- Iftikar, F. I., Matey, V. and Wood, C.M.** (2010). The ionoregulatory responses to hypoxia in the freshwater rainbow trout *Oncorhynchus mykiss*. *Physiol. Biochem. Zool.* **83**, 343-355.
- Jensen, F. B.** (2003). Nitrite disrupts multiple physiological functions in aquatic animals. *Comp. Biochem. Physiol.* **135A**, 9 - 24.
- Jensen, F. B.** (2007). Nitric oxide formation from nitrite in zebrafish. *J. Exp. Biol.* **210**, 3387 - 3394.
- Jensen, F. B.** (2009). The role of nitrite in nitric oxide homeostasis: A comparative perspective. *Biochim. Biophys. Acta* **1787**, 841-848.
- Jensen, F. B. and Hansen, M. N.** (2011). Differential uptake and metabolism of nitrite in normoxic and hypoxic goldfish. *Aquat. Toxicol.* **101**, 318 - 325.
- Jensen, F. B., Hansen, M. N., Montesanti, G. and Wang, T.** (2014). Nitric oxide metabolites during anoxia and reoxygenation in the anoxia-tolerant vertebrate, *Trachemys scripta*. *J. Exp. Biol.* **217**, 423-431.
- Kelleher, Z. T., Matsumoto, A., Stamler, J. S. and Marshall, H. E.** (2007). NOS2 regulation of NF- $\kappa$ B by S-nitrosylation of p65. *J. Biol. Chem.* **282**, 30667–30672.
- Kiilerich, P., Kristiansen, K. and Madsen, S. S.** (2007). Cortisol regulation of ion transporter mRNA in Atlantic salmon gill and the effect of salinity on the signaling pathway. *J. Endocrinol.* **194**, 417–427.
- LeCras, T. D., Xue, C., Rengasamy, A. and Johns, R. A.** (1996). Chronic hypoxia upregulates endothelial and inducible NO synthase gene and protein expression in rat lung. *Am. J. Physiol.* **270**, L164-L170.
- Lefevre, S., Jensen, F. B., Huong, D. T. T., Wang, T., Phuong, N. T. and Bayley, M.** (2011). Effects of nitrite exposure on functional haemoglobin levels, bimodal respiration, and swimming performance in the facultative air-breathing fish *Pangasianodon hypophthalmus*. *Aquat. Toxicol.* **104**, 86-93.
- Lewis, W. M., Jr. and Morris, D. P.** (1986). Toxicity of nitrite to fish: a review. *Trans. Am. Fish. Soc.* **115**, 183-195.
- Lowry, O. H., Rosebrough, N. J., Farr, A. L. and Randall, R. J.** (1951). Protein measurement with the Folin phenol reagent. *J. Biol. Chem.* **193**, 265-275.
- Lundberg, J. O., Weitzberg, E. and Gladwin, M. T.** (2008). The nitrate-nitrite-nitric oxide pathway in physiology and therapeutics. *Nat. Rev. Drug Dis.* **7**, 156-167.



- Lundgreen, K., Kiillerich, P., Tipsmark, C. K., Madsen, S. S. and Jensen, F. B.** (2008). Physiological response in the European flounder (*Platichthys flesus*) to variable salinity and oxygen conditions. *J. Comp. Physiol. B* **178**, 909-915.
- Marshall, H. E. and Stamler, J. S.** (2001). Inhibition of NF- $\kappa$ B by S-nitrosylation. *Biochemistry* **40**, 1688-1693.
- McCormick, S. D.** (1993). Methods for nonlethal gill biopsy and measurement of Na<sup>+</sup>,K<sup>+</sup>-ATPase activity. *Can. J. Fish. Aquat. Sci.* **50**, 656-658.
- McNeill, B. and Perry, S. F.** (2006). The interactive effects of hypoxia and nitric oxide on catecholamine secretion in rainbow trout (*Oncorhynchus mykiss*). *J. Exp. Biol.* **209**, 4214-4223.
- Mitrovic, D., Dymowska, A., Nilsson, G. E. and Perry, S. F.** (2009). Physiological consequences of gill remodeling in goldfish (*Carassius auratus*) during exposure to long-term hypoxia. *Am. J. Physiol. Regul. Integr. Comp. Physiol.* **297**, R224-R234.
- Nilsson, G. E.** (2007). Gill remodeling in fish – a new fashion or an ancient secret? *J. Exp. Biol.* **210**, 2403-2409.
- Park, S. K., Lin, H. L. and Murphy, S.** (1997). Nitric oxide regulates nitric oxide synthase-2 gene expression by inhibiting NF- $\kappa$ B binding to DNA. *Biochem. J.* **322**, 609-613.
- Pfaffl, M. W.** (2001). A new mathematical model for relative quantification in real-time RT-PCR. *Nucleic Acids Res.* **29**, e45.
- Richards, J. G., Semple, J. W., Bystriansky, J. S. and Schulte, P. M.** (2003) Na<sup>+</sup>/K<sup>+</sup>-ATPase  $\alpha$ -isoform switching in gills of rainbow trout (*Oncorhynchus mykiss*) during salinity transfer. *J. Exp. Biol.* **206**, 4475-4486
- Richards, J. G., Wang, Y. S., Brauner, C. J., Gonzalez, R. J., Patrick, M. L., Schulte, P. M., Choppari-Gomes, A. R., Almeida-Val, V. M. and Val, A. L.** (2007). Metabolic and ionoregulatory responses of the Amazonian cichlid, *Astronotus ocellatus*, to severe hypoxia. *J. Comp. Physiol. B* **177**, 361-374.
- Roberts, R. J., Agius, C., Saliba, C., Bossier, P. and Sung, Y. Y.** (2010). Heat shock proteins (chaperones) in fish and shellfish and their potential role in relation to fish health: a review. *J. Fish Dis.* **33**, 789–801.
- Robinson, M. A., Baumgardner, J. E. and Otto, C. M.** (2011). Oxygen-dependent regulation of nitric oxide production by inducible nitric oxide synthase. *Free Radic. Biol. Med.* **51**, 1952-1965.
- Rozen, S. and Skaletsky, H.** (2000). Primer3 on the WWW for general users and for biologist programmers. In: *Methods in Molecular Biology, vol. 132: Bioinformatics Methods and Protocol* (ed. S. Misener and S. A. Krawetz), pp. 365-386. Totowa, NJ: Humana Press.

- Sandvik, G. K., Nilsson, G. E. and Jensen F. B.** (2012). Dramatic increase of nitrite levels in hearts of anoxia-exposed crucian carp supporting a role in cardioprotection. *Am. J. Physiol. Regul. Integr. Comp. Physiol.* **302**, R468-R477.
- Shiva, S., Sack, M. N., Greer, J. J., Duranski, M., Ringwood, L. A., Burwell, L., Wang, X., MacArthur, P. H., Shoja, A., Raghavachari, N. et al.** (2007). Nitrite augments tolerance to ischemia/reperfusion injury via the modulation of mitochondrial electron transfer. *J. Exp. Med.* **204**, 2089-2102.
- Soivio, A. and Tuurala, H.** (1981). Structural and circulatory responses to hypoxia in the secondary lamellae of *Salmo gairdneri* gills at two temperatures. *J. Comp. Physiol.* **145**, 37-43.
- Stormer, J., Jensen, F. B. and Rankin, J. C.** (1996). Uptake of nitrite, nitrate, and bromide in rainbow trout, *Oncorhynchus mykiss*: effects on ionic balance. *Can. J. Fish. Aquat. Sci.* **53**, 1943-1950.
- Sun, S., Ge, X., Xuan, F., Zhu, J. and Yu, N.** (2014). Nitrite-induced hepatotoxicity in bluntnout bream (*Megalobrama amblycephala*): the mechanistic insight from transcriptome to physiology analysis. *Environ. Toxicol. Pharmacol.* **37**, 55-65.
- Takle, H., McLeod, A. and Andersen, O.** (2006). Cloning and characterization of the executioner caspases 3, 6, 7 and Hsp70 in hyperthermic Atlantic salmon (*Salmo salar*) embryos. *Comp. Biochem. Physiol. B Biochem. Mol. Biol.* **144**, 188–198.
- Taylor, B. S., Kim, Y-M., Wang, Q., Shapiro, R. A., Billiar, T. R. and Geller, D.A.** (1997). Nitric oxide down-regulates hepatocyte-inducible nitric oxide synthase gene expression. *Arch. Surg.* **132**, 1177-1183.
- Thomas, D. D., Ridnour, L. A., Isenberg, J. S., Flores-Santana, W., Switzer, C. H., Donzelli, S., Hussain, P., Vecoli, C., Paolocci, N., Ambs, S., Colton, C. A., Harris, C. C., Roberts, D. D. and Wink, D.A.** (2008). The chemical biology of nitric oxide: Implications in cellular signaling. *Free Radic. Biol. Med.* **45**, 18-31.
- Thompson, L., Dong, Y. and Evans L.** (2009). Chronic hypoxia increases inducible NOS-derived nitric oxide in fetal guinea pig hearts. *Pediatr. Res.* **65**, 188-192.
- Tipsmark, C. K. and Madsen, S. S.** (2003). Regulation of Na<sup>+</sup>/K<sup>+</sup>-ATPase activity by nitric oxide in the kidney and gill of the brown trout (*Salmo trutta*). *J. Exp. Biol.* **206**, 1503-1510.
- Tomasso, J.R. and Grosell, M.** (2005). Physiological basis for large differences in resistance to nitrite among freshwater and freshwater-acclimated euryhaline fishes. *Environ. Sci. Technol.* **39**, 98-102.
- Williams, E. M. and Eddy, F. B.** (1986). Chloride uptake in freshwater teleosts and its relationship to nitrite uptake and toxicity. *J. Comp. Physiol. B* **156**, 867-872.

- Woo, N. Y. S. and Chiu, S. F.** (1997). Metabolic and osmoregulatory responses of the sea bass *Lates calcarifer* to nitrite exposure. *Environ. Toxicol. Water Qual.* **12**, 257-264.
- Wood, C. M, Kajimura, M., Sloman, K. A., Scott, G. R., Walsh, P. J., Almeida-Val, V. M. F. and Val, A. L.** (2007). Rapid regulation of Na<sup>+</sup> fluxes and ammonia excretion in response to acute environmental hypoxia in the Amazonian oscar, *Astronotus ocellatus*. *Am. J. Physiol. Regul. Integr. Comp. Physiol.* **292**, R2048-R2058.
- Yang, B. K., Vivas, E. X., Reiter C. D. and Gladwin, M. T.** (2003). Methodologies for the sensitive and specific measurement of S-nitrosothiols, iron-nitrosyls, and nitrite in biological samples. *Free Radic. Res.* **37**, 1-10.

## Figures

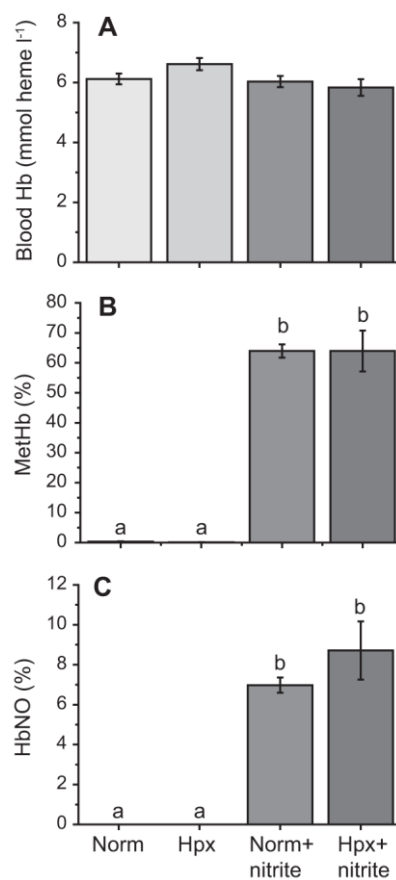

**Fig. 1. Total hemoglobin (Hb), methemoglobin (metHb) and nitrosylhemoglobin (HbNO) in brown trout under different oxygen and nitrite regimes.** Total Hb concentration (A), metHb content (B), and HbNO content (C) in whole blood of brown trout in normoxic (Norm;  $P_{O_2} > 140$  mmHg) and hypoxic (Hpx; one day at  $P_{O_2} = 70$  mmHg) water and after one day exposure to 1mmol l<sup>-1</sup> ambient nitrite in normoxic and hypoxic water. Values are means  $\pm$  s.e.m. ( $N$  is 7 in normoxia, 8 in hypoxia, 8 in normoxia + nitrite, and 5 in hypoxia + nitrite). Different letters at columns signify a significant difference ( $P < 0.05$ ).

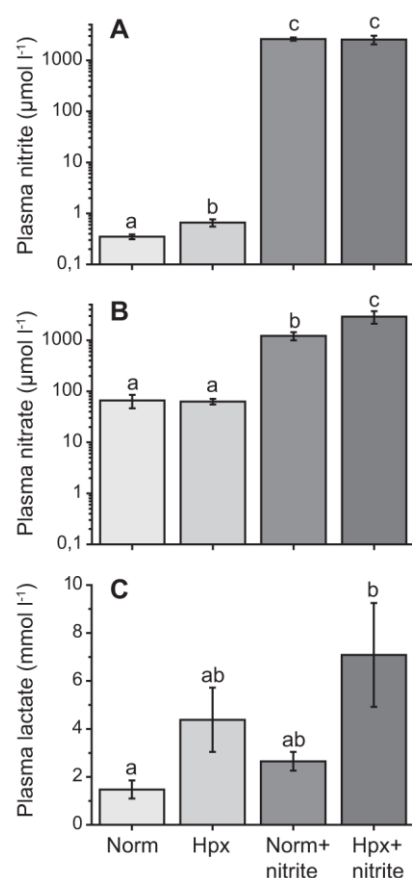

**Fig. 2. Plasma nitrite, nitrate and lactate levels.** Plasma concentrations of nitrite (A), nitrate (B), and lactate (C) in brown trout under normoxic and hypoxic conditions and after 1-d exposure to 1 mmol l<sup>-1</sup> ambient nitrite under normoxic and hypoxic conditions. Note the logarithmic scale for nitrite and nitrate panels. Other details are as in Fig. 1.

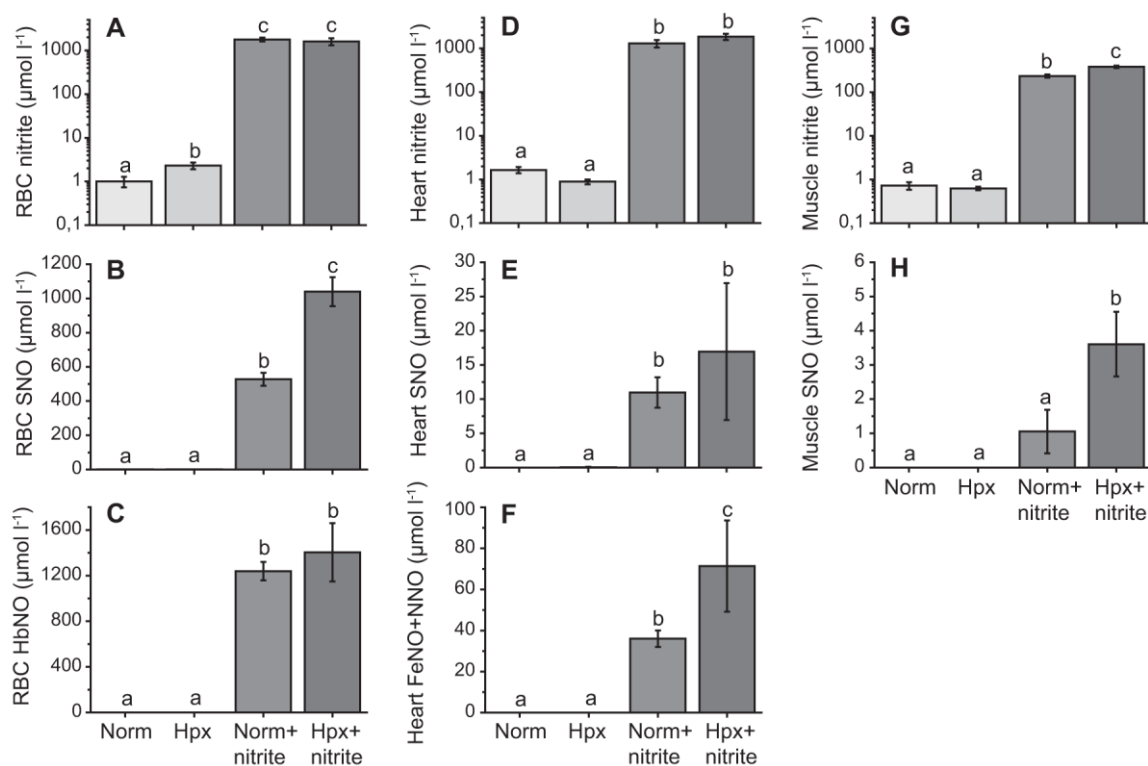

**Fig. 3. Cellular levels of nitrite and nitros(yl)ated metabolites.** Values are given for red blood cells (A, B, C), heart ventricle (D, E, F) and white skeletal muscle (G, H) of brown trout exposed to normoxia and hypoxia in the absence and presence of ambient nitrite. Nitrite levels are shown in panel A, D and G (note logarithmic scale) and SNO levels are shown in B, E, H. Erythrocyte HbNO is shown in C and heart FeNO+NNO is shown in F. White muscle FeNO+NNO is not depicted, as levels were below detection level with the available amount of sample. Other details are as in Fig.

1.

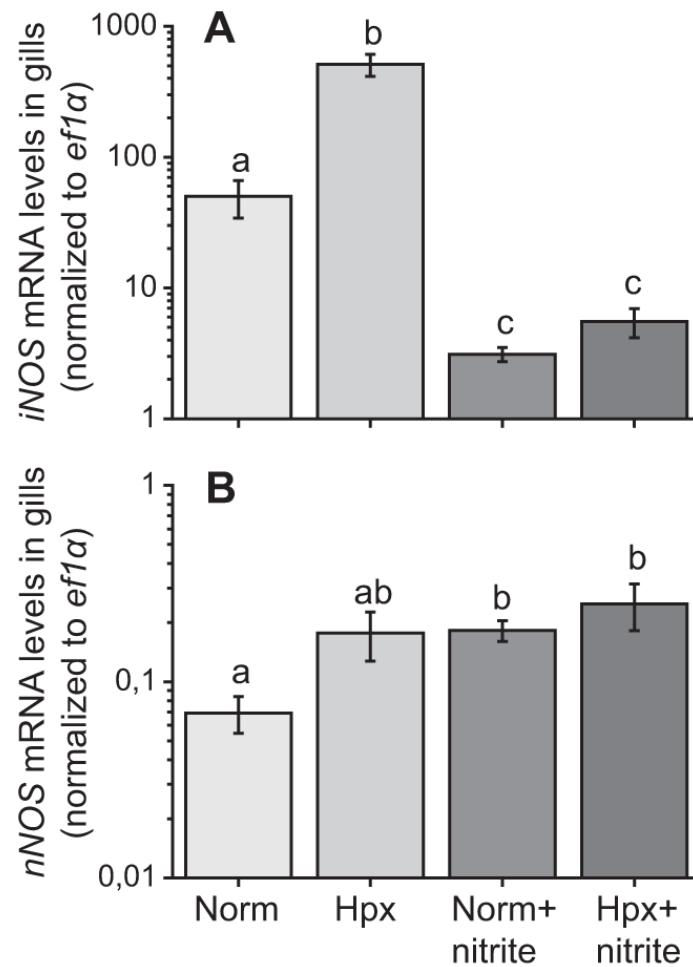

**Fig. 4. Expression of inducible *NOS* (*iNOS*) and neural *NOS* (*nNOS*) in gills.** Levels of *iNOS* mRNA (A) and *nNOS* mRNA (B) under the four experimental conditions are revealed. Levels were normalized to the expression of *ef1α* (which did not change with treatment). Note logarithmic scale. Other details as in Fig. 1.



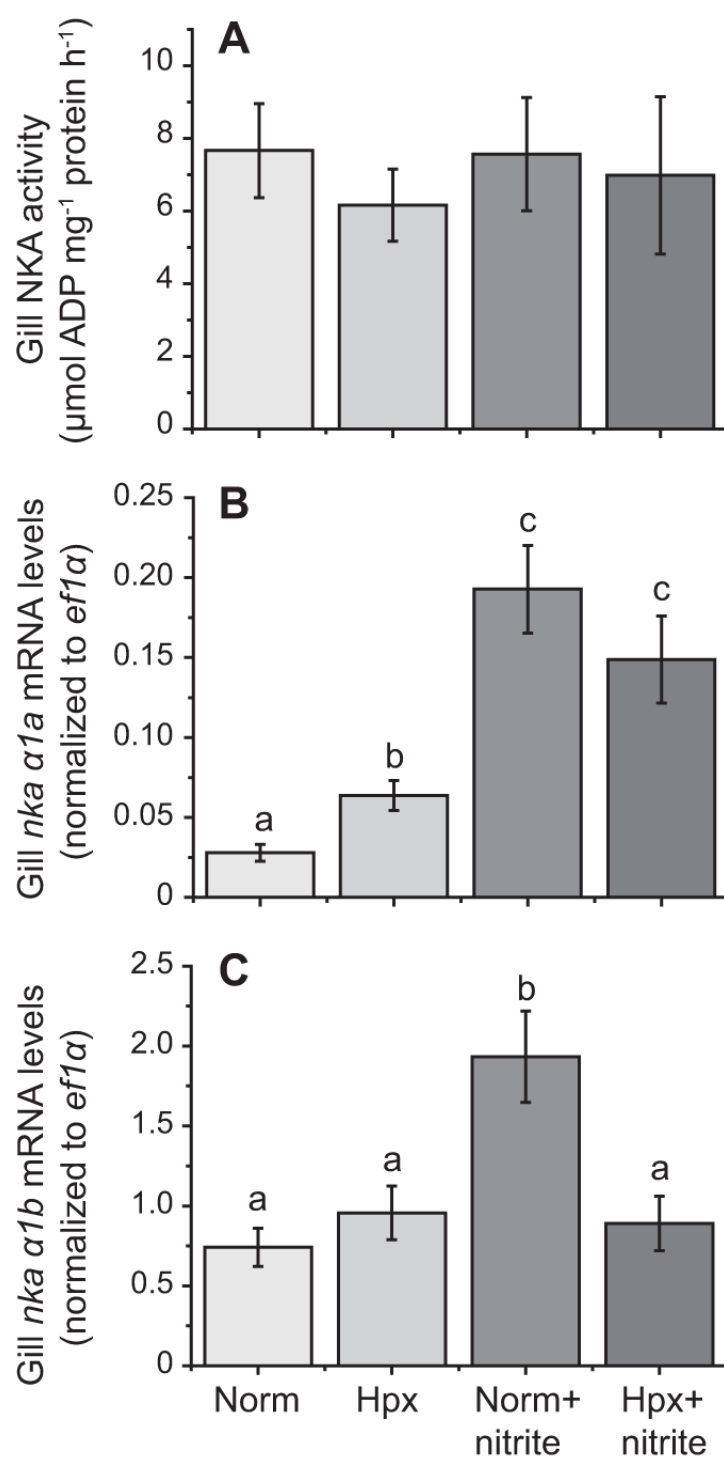

**Fig. 5. Gill Na<sup>+</sup>/K<sup>+</sup>-ATPase (NKA) activity and expression.** Enzymatic activity of NKA (A) and mRNA levels of *nka α1a* (B) and *nka α1b* (C) subunits in gill tissue of brown trout under the four experimental conditions. Other details as in Fig. 1.

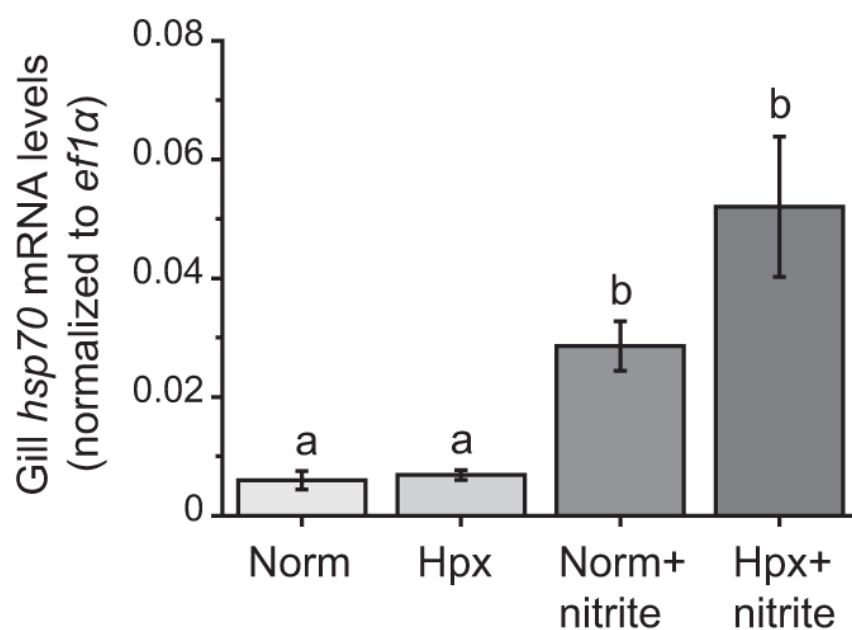

**Fig. 6. Heat shock protein 70 expression in gills.** *hsp70* mRNA levels in gill tissue under the four experimental conditions are shown. Other details as in Fig. 1.

Table1. Target genes and sequences of primers used to investigate mRNA levels of gills from brown trout.

| Target         | Forward primer 5'→3'       | Reverse primer 5'→3'     | Accession no. |
|----------------|----------------------------|--------------------------|---------------|
| <i>iNOS</i>    | CCCAGCACTCCAGTCATTCT       | ATGTCGTGTAGCCGTTGTTG     | AJ300555      |
| <i>nNOS</i>    | TGTAGGACGCATTCAAGTGGT      | ACATTCCATGAGCCGTTGTG     | DQ640498      |
| <i>nka α1a</i> | CCCAGGATCACTCAATGTCAC      | CCAAAGGCAAATGGGTTTAAT    | AY319391      |
| <i>nka α1b</i> | CTGCTACATCTCAAACCAACAACATT | CACCATCACAGTGTTTCATTGGAT | AY319390      |
| <i>hsp70</i>   | CATCGACTTCTACACCTCCATCAC   | CTGAAGAGGTCGGAACACATCTC  | AJ632154      |
| <i>ef1α</i>    | GAGAACCATTGAGAAGTTCGAGAAG  | GCACCCAGGCATACTTGAAAG    | AF321836      |

**List of symbols and abbreviations**

|                               |                                                            |
|-------------------------------|------------------------------------------------------------|
| <i>ef1<math>\alpha</math></i> | elongation factor 1 $\alpha$ gene or transcript            |
| FeNO                          | iron-nitrosyl                                              |
| Hb                            | hemoglobin                                                 |
| HbNO                          | nitrosylhemoglobin                                         |
| HSP70                         | heat shock protein 70 protein                              |
| <i>hsp70</i>                  | heat shock protein 70 gene or transcript                   |
| iNOS                          | inducible nitric oxide synthase protein                    |
| <i>iNOS</i>                   | inducible nitric oxide synthase gene or transcript         |
| metHb                         | methemoglobin                                              |
| NKA                           | Na <sup>+</sup> /K <sup>+</sup> -ATPase protein            |
| <i>nka</i>                    | Na <sup>+</sup> /K <sup>+</sup> -ATPase gene or transcript |
| NNO                           | <i>N</i> -nitroso compound                                 |
| nNOS                          | neuronal nitric oxide synthase protein                     |
| <i>nNOS</i>                   | neuronal nitric oxide synthase gene or transcript          |
| Po <sub>2</sub>               | oxygen tension                                             |
| SNO                           | <i>S</i> -nitroso compound                                 |
